1 **Unveiling the threat: Characterization of *Clostridioides difficile* Infection in**  
2 **the Northwest Region of Buenos Aires between 2019-2023 and Associated**  
3 **Risk Factors redefined through a Meta-Analysis**

4 Angela María Barbero<sup>1,2,#</sup>, Nicolás Diego Moriconi<sup>1,#</sup>, Sabina Palma<sup>1,2,#</sup>, Josefina  
5 Celano<sup>1</sup>, María Gracia Balbi<sup>3</sup>, Lorenzo Sebastián Morro<sup>1</sup>, María Martina Calvo  
6 Zarlenga<sup>4</sup>, Jorgelina Suárez<sup>3,5</sup>, María Guadalupe Martínez<sup>3</sup>, Mónica Graciela  
7 Machain<sup>3</sup>, Carlos Gabriel Altamiranda<sup>4</sup>, Gabriel Erbiti<sup>4,5</sup>, Rodrigo Emanuel  
8 Hernández Del Pino<sup>1,2, ζ</sup>, Virginia Pasquinelli<sup>1,2, \*, ζ</sup>.

9 1 Centro de Investigaciones Básicas y Aplicadas (CIBA), Universidad Nacional del  
10 Noroeste de la Provincia de Buenos Aires (UNNOBA). B6000DNE, Buenos Aires,  
11 Argentina.

12 2 Centro de Investigaciones y Transferencias del Noroeste de la Provincia de  
13 Buenos Aires (CIT NOBA), UNNOBA-Universidad Nacional de San Antonio de  
14 Areco (UNSAAdA)-Consejo Nacional de Investigaciones Científicas y Técnicas  
15 (CONICET). Buenos Aires, Argentina.

16 3 Servicio de Laboratorio, Sala de Microbiología, Hospital Interzonal General de  
17 Agudos (HIGA) Dr. Abraham F. Piñeyro, Junín, Buenos Aires, Argentina

18 4 Clínica Centro Médico Privado SRL, Junín, Buenos Aires, Argentina

19 5 Universidad Nacional del Noroeste de la Provincia de Buenos Aires (UNNOBA).  
20 B6000DNE, Buenos Aires, Argentina.

21 # Angela María Barbero, Nicolás Diego Moriconi and Sabina Palma share first  
22 authorship.

23 ζ Rodrigo Emanuel Hernández Del Pino Rodrigo and Virginia Pasquinelli share the  
24 last authorship.

25 \*Corresponding author: [virpasquinelli@gmail.com](mailto:virpasquinelli@gmail.com), Tel: +5492364582417, Address:  
26 Coronel Borges 379, Junín (Postal Code 6000), Buenos Aires, Argentina.

27 **Conflict of interest.** *The authors declare that the research was conducted in the*  
28 *absence of any commercial or financial relationships that could be construed as a*  
29 *potential conflict of interest.*

30 1 in 5 diarrheas is caused by *C. difficile* in the Northwest region of Buenos Aires,  
31 Argentina. One third of the cases were community-acquired and involved toxigenic  
32 strains. Comparison through meta-analysis identified known and also new risk  
33 factors.

34 **Abstract**

35 *Clostridioides difficile* stands as the leading cause of hospital acquired enteric  
36 infection in developed countries. In Argentina, the epidemiology of *Clostridioides*  
37 *difficile* infection (CDI) is currently poorly characterized. Therefore, we conducted a  
38 retrospective case-control study evaluating the prevalence of CDI in 249 stool  
39 samples collected between 2019 and 2023 in the Northwest region of Buenos  
40 Aires. The presence of *C. difficile* was detected by combining three techniques  
41 (EIA, PCR and toxigenic culture) in a diagnostic algorithm. Clinical and  
42 demographic data from patients was also analyzed to identify CDI-associated risk  
43 factors. 1 in 5 patients presented *C. difficile* as the etiological agent of diarrhea and  
44 the 80% of CDI+ cases carried toxigenic strains, with a third of cases acquired in  
45 the community. Age  $\geq 69$  years, previous use of antibiotics, previous hospitalization  
46 and previous episodes of CDI emerged as predisposing factors for CDI in our study  
47 cohort. Blood parameters such as an elevated number of leukocytes and platelets,  
48 a decreased basophil count, and an increased urea concentration were identified  
49 as indicators of CDI. We also carried out a systematic review and a meta-analysis  
50 where we contrasted our results with 39 studies selected from different countries  
51 around the world. At the global level, the meta-analysis highlighted advanced age,  
52 previous consumption of antibiotics and previous hospitalization as CDI risk factors  
53 and the leukocyte count as an indicator of CDI. These results emphasize the  
54 importance of epidemiological studies and reveal crucial information for healthcare  
55 decision-making regarding CDI.

56 **Keywords:** *C. difficile*, epidemiology, risk factors, meta-analysis

57 **Running title:** Risk factors and meta-analysis of CDI

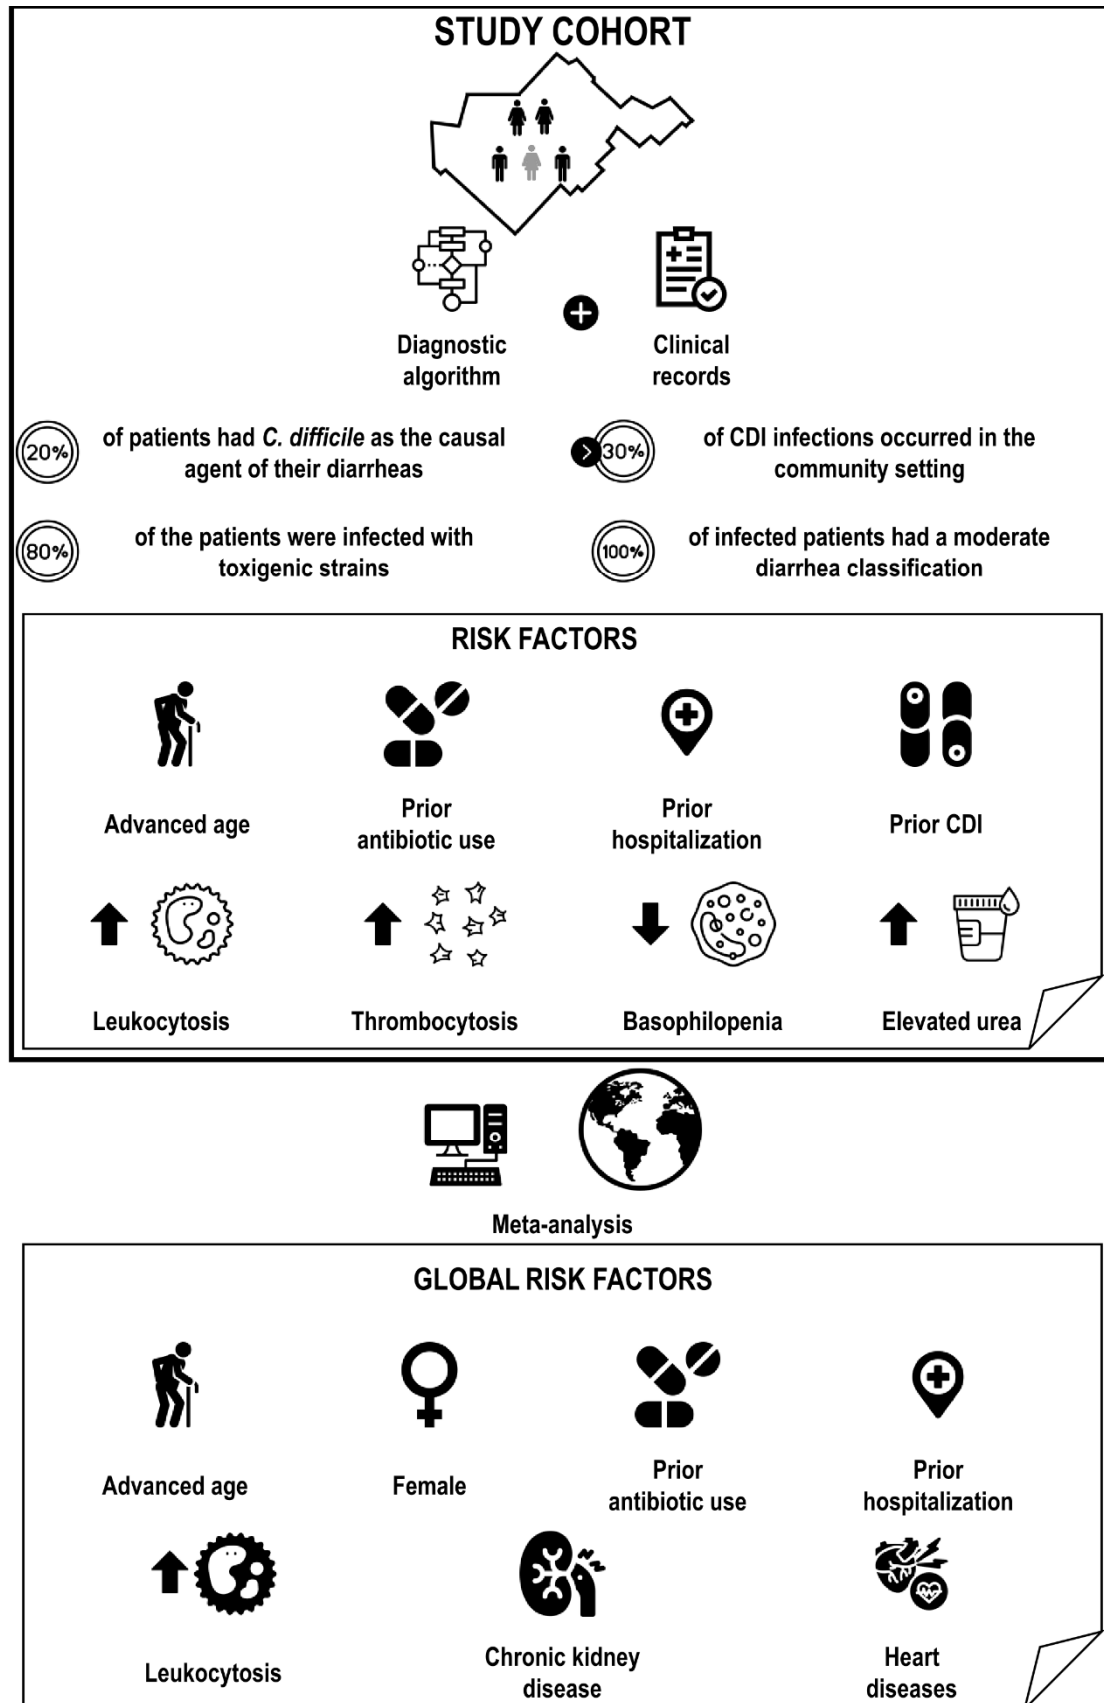

## 59 Introduction

60 *Clostridioides difficile* infection (CDI) is considered as the most frequent hospital-  
61 acquired disease<sup>1,2</sup>. Since 2019, the Centers for Disease Control (CDC) have  
62 identified *C. difficile* as an “urgent threat”, with the immediate need to implement  
63 prevention and control actions<sup>3</sup>. *C. difficile* is a Gram positive, anaerobic and  
64 spore-forming bacterium that causes intestinal damage primarily through the  
65 production of two main toxins: toxin A (TcdA) and toxin B (TcdB)<sup>4</sup>. These toxins  
66 play a crucial role in the pathogenesis of CDI by damaging the cells lining the gut.  
67 CDI can be life-threatening, ranging from mild diarrhea to pseudomembranous  
68 colitis and causing nearly 500,000 cases per year in the United States<sup>5</sup>.

69 CDI is also a major economic burden to the health care systems, which is closely  
70 linked to the high recurrence rates of this infection. Although standard treatments  
71 resolve CDI in most cases, up to 35% of CDI-treated patients will experiment a  
72 recurrence of the disease with aggravated symptoms<sup>5</sup>. Common therapy for CDI  
73 includes antibiotics such as metronidazole for mild cases and vancomycin or  
74 fidaxomicin for moderate to severe cases<sup>6</sup>. Therapies with the human antibody  
75 bezlotoxumab against *C. difficile* toxin B or Fecal Microbiota Transplant (FMT) to  
76 restore the balance of the microbiome have been recommended to treat or prevent  
77 recurrences<sup>7,8</sup>.

78 Regarding global epidemiology, while healthcare-associated CDI has declined in  
79 recent years, the incidence of community-acquired CDI is on the rise<sup>9-14</sup>. The main  
80 transmission route for *C. difficile* is through direct Person-to-Person contact by the  
81 fecal-oral route<sup>15</sup>. *C. difficile* spores constitute the main form of resistance and can  
82 persist in the environment for long periods<sup>16,17</sup>. Then, contaminated surfaces, food  
83 or water, as well as asymptomatic carriers, are typical sources of community  
84 transmission<sup>18-20</sup>.

85 Several risk factors are associated with the development of CDI. The use of  
86 antimicrobials with emphasis on broad-spectrum antibiotics, has been described as  
87 the most significant risk factor for CDI<sup>21,22</sup>. These antibiotics can disrupt the normal  
88 balance of bacteria in the gastrointestinal tract, generating dysbiosis and so  
89 allowing *C. difficile* overgrowth in the gut. Hospitalization in healthcare facilities and  
90 advanced age, which can be related to weakened immune systems and a higher  
91 likelihood of residing in healthcare settings, also constitute important risk factors<sup>22</sup>.  
92 The use of stomach acid regulators, such as proton pump inhibitors (PPIs) and H2  
93 blockers, has been associated with an increased risk of CDI<sup>23</sup>; however, this is still  
94 under debate. Previous episodes of CDI increase the risk of recurrence<sup>24</sup>. Finally,  
95 several underlying health conditions that could compromise the immune system  
96 could contribute to increased susceptibility or severity of the infection.  
97 Comorbidities such as Inflammatory Bowel Disease (IBD)<sup>25</sup>, Crohn's disease<sup>25</sup>,  
98 ulcerative colitis<sup>25</sup>, diabetes<sup>26</sup> and chronic kidney disease (CKD)<sup>27</sup> can enhance  
99 the risk of CDI.

100 Certain clinical procedures (e.g. chemotherapy treatments and gastrointestinal  
101 surgery), malnutrition or enteral nutrition, organ transplantation along with  
102 immunosuppressive medications and blood disorders may also elevate the risk of  
103 CDI<sup>28,29</sup>.

104 Understanding geographical variations in prevalence by studying CDI epidemiology  
105 and risk factors is essential for preventing, controlling, and managing the infection.  
106 In Latin America, and particularly in Argentina, comprehensive epidemiological  
107 data on CDI are limited. It has been reported that patients with diarrhea are not  
108 routinely tested for *C. difficile* in developing countries and, when tested, very often  
109 only the enzyme immunoassay (EIA) is used<sup>30-32</sup>. This could lead to an  
110 underestimation in the diagnosis and high economic burdens for the health system.  
111 Our retrospective study (2019-2023) assesses the prevalence of *C. difficile* among  
112 health care centers of the Northwest region of Buenos Aires, Argentina.  
113 Furthermore, with the aim to characterize our study cohort, we analyzed the  
114 demographic and clinical data of the patients and we conducted a meta-analysis to  
115 compare our findings with global reports.

## 116 Methodology

### 117 Human Samples and Participating Institutions

118 The research was carried out in accordance with the Declaration of Helsinki (2013)  
119 and approved by the UNNOBA (Universidad Nacional del Noroeste de la Provincia  
120 de Buenos Aires) Ethics Committee (COENOBA).

121 Fecal samples from hospitalized adult patients with diarrhea were collected after  
122 obtaining informed consents and frozen at -20 °C until use. The samples were  
123 derived from the following health-care centers: Hospital Interzonal General de  
124 Agudos (HIGA) Abraham Félix Piñeyro, Clínica Centro Médico Privada SRL and  
125 Clínica IMEC. Samples received between January 1, 2019 and December 31,  
126 2023 from Sanitary Region III of Buenos Aires, Argentina (**Supplementary Fig. 1**)  
127 were included in this analysis.

### 128 Patients characterization

129 The presence of *C. difficile* was determined in the fecal samples using a diagnostic  
130 algorithm (**Supplementary Fig. 2**) as recommended by Crobach et al. in 2016<sup>33</sup>.  
131 Briefly, three tests were used in a retrospective approach: Enzyme immunoassay  
132 (EIA, CoproStrip™ *C. difficile* GDH + Toxin A + Toxin B (Savyon® Diagnostics  
133 Ltd)), Polymerase Chain Reaction from stool samples (PCR, Taq Phire Tissue  
134 Direct PCR Master Mix (Thermo Fisher)) and Toxigenic culture (stool culture in  
135 CHROMAgar™ *C. difficile* plates + PCR from isolated *C difficile* colonies).

136 Patients were defined as CDI+ or CDI- and clinical, demographic and blood  
137 parameters were evaluated (**Table 1**).

138 CDI classifications by setting of acquisition and severity were defined according to  
139 the Infectious Diseases Society of America (IDSA) criteria<sup>34</sup>.

| Clinical-demographical parameters      | Blood parameters                     |
|----------------------------------------|--------------------------------------|
| Age                                    | Leukocytes (cells/mm <sup>3</sup> )  |
| Biological Sex                         | Neutrophils (cells/mm <sup>3</sup> ) |
| Previous hospitalization               | Monocytes (cells/mm <sup>3</sup> )   |
| Previous consumption of Antibiotics    | Lymphocytes (cells/mm <sup>3</sup> ) |
| Antibiotics use during hospitalization | Eosinophils (cells/mm <sup>3</sup> ) |
| Presence of comorbidities              | Basophils (cells/mm <sup>3</sup> )   |

|                                                |                                    |
|------------------------------------------------|------------------------------------|
| Previous consumption of Proton Pump Inhibitors | Platelets (cells/mm <sup>3</sup> ) |
| Previous CDI                                   | Urea (mg/dl)                       |
| Place of hospitalization                       | Creatinine (mg/dl)                 |
| Need for Intensive Care Unit (ICU)             | Albumin (g/dl)                     |
| Origin                                         |                                    |
| Diarrhea classification                        |                                    |
| Shock                                          |                                    |
| Death                                          |                                    |

140

141 **Table 1.** Clinical, demographic and blood parameters evaluated in CDI+ and CDI-  
142 patients.

### 143 **Meta-analysis design**

144 A bibliographic search was carried out using PubMed and Google Scholar  
145 databases in addition to the AI SciSpace tool. The reports that fulfilled the definition  
146 criteria of cases and controls were selected. The meta-analysis workflow is  
147 summarized in **Fig. 4**.

### 148 **Statistical Analysis**

149 For clinical, demographic and blood parameters comparisons, parametric t-test or  
150 non-parametric Mann-Whitney test for unpaired samples were used. Fisher's exact  
151 test was used to analyze the frequency distribution of qualitative/nominal variables.  
152 Data was analyzed using GraphPad Prism 8.0.1 software (San Diego, CA, USA)  
153 and p values <0.05 were considered statistically significant.

154 For the meta-analysis, the “Metafor” package from RStudio (2023.06.1+524  
155 version) was used<sup>35</sup>. The Odds Ratio (OR, for categorical variables) and the  
156 Standardized Mean Difference (SMD, for continuous variables) were calculated  
157 and a REML (Random Effect Maximum Likelihood) model was employed. Models  
158 with a p value <0.05 were considered as potential predictors of CDI incidence risk.



## 159 Results and Discussion

### 160 CDI prevalence in Northwest Buenos Aires

161 In Argentina, studies and reports on CDI are scarce and heterogeneous<sup>36–39</sup>. In  
162 order to contribute to a better understanding of the disease, we conducted a  
163 retrospective analysis of 249 fecal samples received between 2019–2023 from  
164 Sanitary Region III of Buenos Aires.

165 We determined *C. difficile* as the causal agent of one in five diarrheas (21.29%)  
166 (**Fig. 1 a**) and we detected that more than the 80% of the patients were infected  
167 with toxigenic strains; indicated by the presence of *C. difficile* Toxin B in the stool  
168 samples (**Fig. 1 b**). This percentage was similar to the worldwide reported  
169 prevalence, where CDI is the underlying cause of 15 to 20% of diarrhea associated  
170 with the use of antibiotics<sup>40</sup>.

171 When analyzing the cases on an annual basis, the frequency of CDI ranged  
172 around 20% from 2019 to 2023 (**Fig. 1 c**). Interestingly, the highest incidence in  
173 our study cohort was observed during 2020, duplicating the percentage of CDI+  
174 cases compared to the rest of the years (**Fig. 1 c**). In relation to this, the COVID-19  
175 pandemic brought about the preventive use of broad-spectrum antibiotics to avoid  
176 bacterial coinfections; which could be associated with the increase in detection<sup>41–</sup>  
177<sup>44</sup>. Nevertheless, CDI detection could have been impacted by the decrease in the  
178 number of tests, a fact that was corroborated in multiple studies carried out during  
179 the early stages of the pandemic<sup>45–47</sup>. Additionally, there could also be an  
180 underestimation of CDI cases<sup>48,49</sup> since SARS-CoV-2 frequently causes  
181 gastrointestinal symptoms similar to those of *C. difficile*<sup>50</sup>.

182 Regarding the severity of the diarrhea, all infected patients had a moderate  
183 classification (**Fig. 1 d**). Importantly, the majority of CDI infections occurred in the  
184 community setting (56.41%) (**Fig. 1 e**). 33.33% of the patients presented with  
185 community-acquired CDI, 23.08% with community-acquired CDI associated with  
186 healthcare environments, and the remaining 43.59% of the patients were hospital-  
187 acquired (**Fig. 1 e**). This is particularly notable, since the epidemiology of CDI has  
188 changed in the last two decades. The 027 strain, responsible for clinical outbreaks  
189 in the early 2000s<sup>51</sup>, has recently decreased its incidence in part due  
190 fluoroquinolones restriction, prevention measures and to improvements in  
191 detection tests that have allowed a better characterization of the circulating  
192 ribotypes<sup>52–56</sup>. Additionally, an increase in strains associated with community  
193 infection (e.g. 078, 014 in Europe and 106 in the US) has been reported in recent  
194 years, with community-acquired cases rising above 40%<sup>11,57–59</sup>.

195

196

197



198

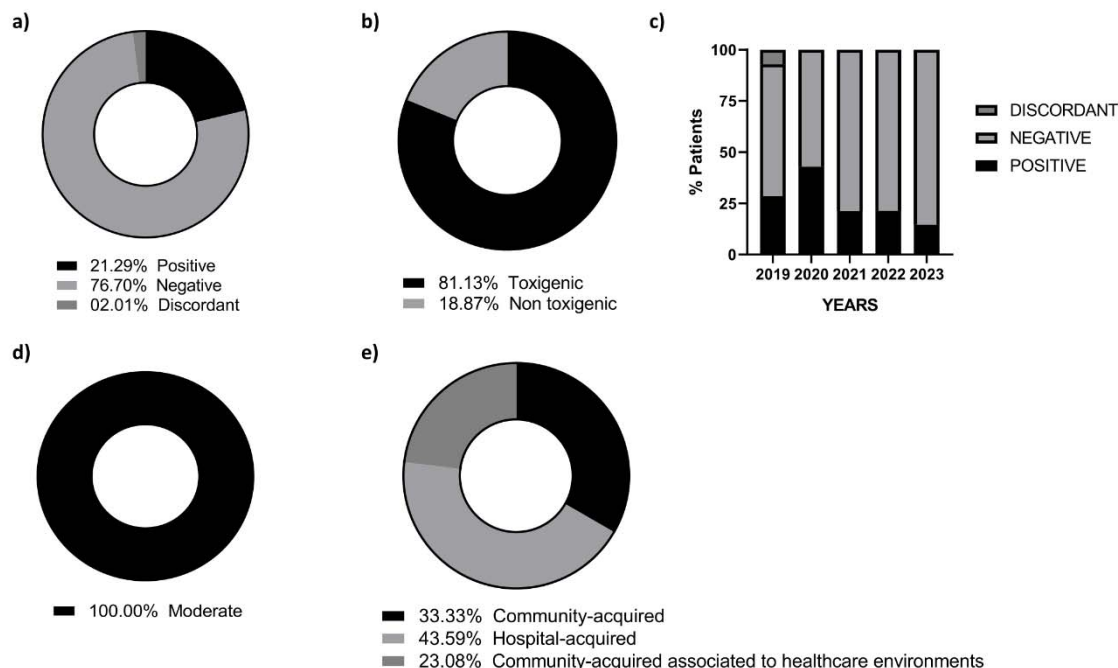

199

200 **Figure 1.** CDI prevalence in Northwestern Buenos Aires.

201 249 stool samples were evaluated using the diagnostic algorithm. a) Donut graph  
202 showing positive, negative and discordant results for the presence of *C. difficile*. b)  
203 Donut graph showing the percentage of toxicogenic strains (presence of Toxin B)  
204 detected in the stool samples. c) CDI+ and CDI- results classified on an annual  
205 basis from 2019 to 2023. d) CDI classification. e) CDI classification by setting of  
206 acquisition.

207

## 208 Risk factors

209 After classifying the patients as CDI+ or CDI-, we determined the risk factors that  
210 could be involved in the prevalence of CDI.

211 As seen in **Fig. 2 a**, we found significant differences in the age of CDI+ and CDI-  
212 populations, with the CDI+ patients presenting a higher average age (CDI+: mean  
213 = 72 years vs. CDI-: mean = 65 years). By using a ROC curve analysis, we  
214 established a cut-off point of 69 years for advanced age as a risk factor in our  
215 cohort (**Fig. 2 b**). Elderly patients have a greater probability of receiving broad-  
216 spectrum antibiotics, being hospitalized or staying longer in hospital settings partly  
217 due to the presence of comorbidities<sup>60,61</sup>.

218 With age, the immune system decreases its functions and also older individuals  
219 develop inflammaging, which could impact in the resolution of the infection; a fact  
220 that was observed for neutrophils<sup>62</sup> and serum IgG against *C. difficile* toxins<sup>63–65</sup>.

221 Regarding biological sex, no differences were found for the proportion of males  
222 and females between both patient populations (**Fig. 2 c**).

223 Consumption of antibiotics in the 3 months prior to the diagnosis of CDI, as well as  
224 previous hospitalizations and infections with *C. difficile*, could be considered risk  
225 factors that predisposes to CDI in our study cohort (**Fig. 2 d, e and f**). Hospitals  
226 and healthcare facilities are common environments for *C. difficile* transmission  
227 since they can be easily colonized by spores that persist on surfaces for months  
228<sup>66,67</sup>. Previous consumption of antibiotics is directly related to the dysbiosis of the  
229 microbiota that enables the colonization of *C. difficile* and is typically considered as  
230 the main risk factor for CDI<sup>68,69</sup>. Some antibiotics, such as clindamycin, broad-  
231 spectrum penicillins, cephalosporins and fluoroquinolones alter the microbiota to a  
232 greater extent than others<sup>68,70,71</sup>. When analyzing the families of antibiotics  
233 consumed by CDI+ patients, we observed that 56.52% had taken some kind of  
234 penicillin prior to diagnosis (**Fig. 2 g**).

235 On the other hand, the consumption of proton pump inhibitors (PPI) prior to  
236 diagnosis and the presence of comorbidities did not show significant differences  
237 between CDI- and CDI+ patients (**Fig. 2 h and i**). **Fig. 2 j** shows a breakdown of  
238 the comorbidities reported in the patients under study. Although they were  
239 analyzed individually, no substantial variations were found between the CDI+ and  
240 CDI- population for any of them.

241 No differences were found regarding the variables referring to the evolution of  
242 patients during admission to health centers such as *hospitalization in common floor*  
243 *or ICU, need for ICU, shock and death* (**Supplementary Fig. 3**).

244

245

246

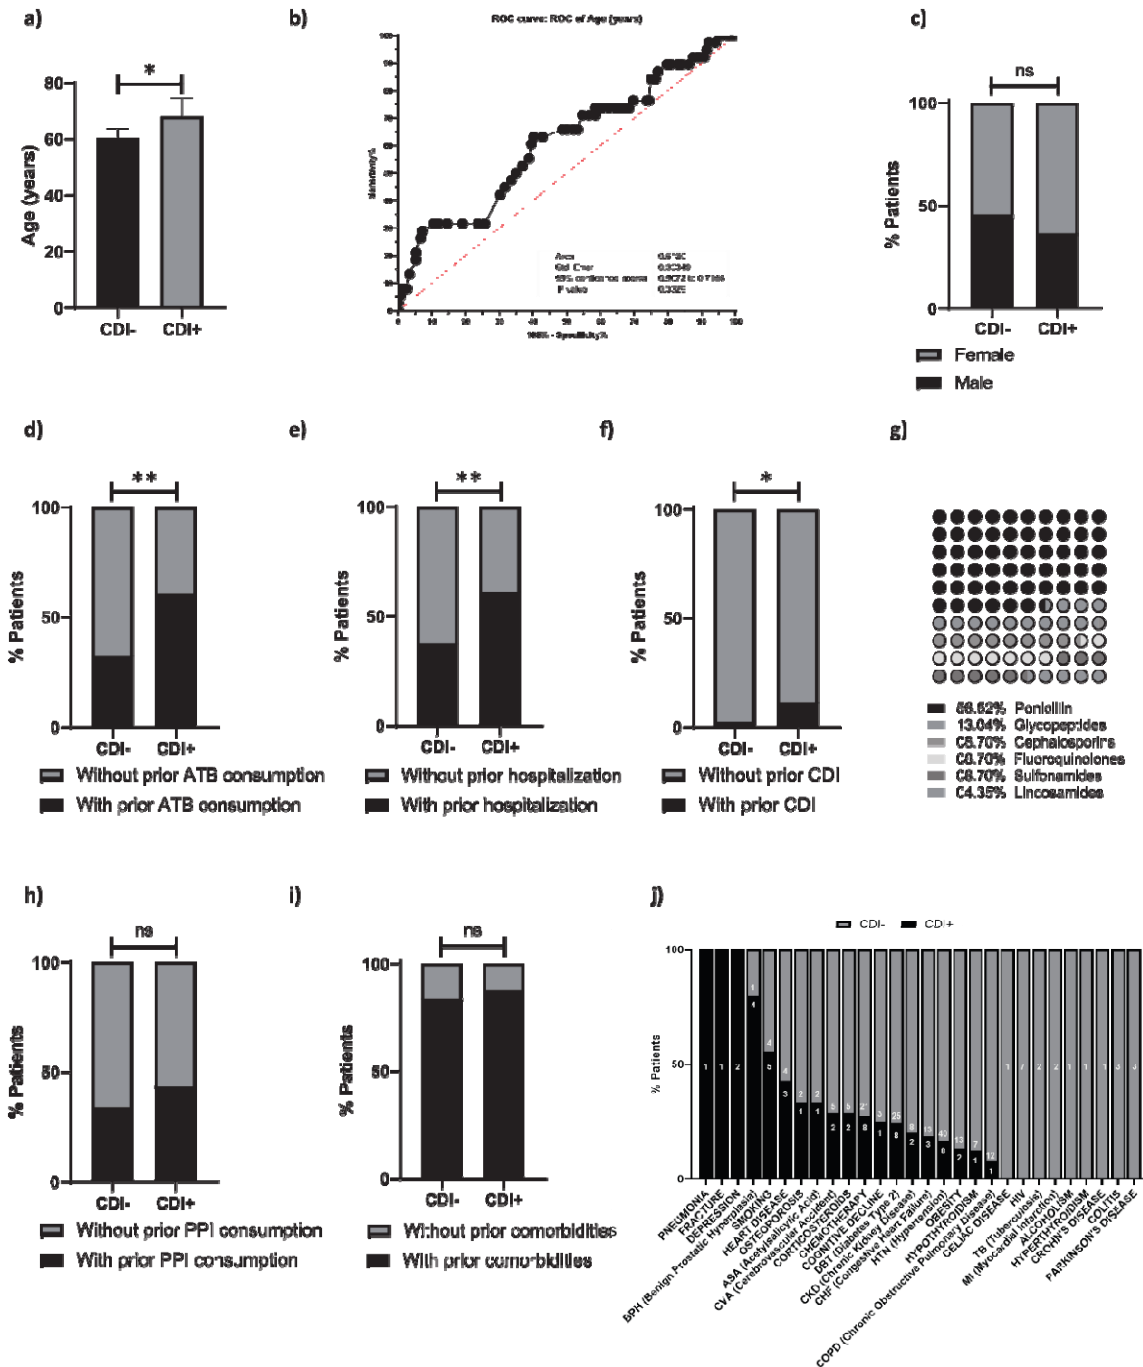

247

248 **Figure 2.** CDI associated risk factors.

249 Evaluation of risk factors associated with CDI. a) Age (years), b) ROC curve to  
 250 establish the age cut-off point, c) biological sex, d) prior antibiotics (ATB)  
 251 consumption, e) prior hospitalization, f) prior CDI, g) antibiotic breakdown by family,  
 252 h) prior PPI consumption, i) comorbidities, j) breakdown of specific comorbidities  
 253 (the white number inside the bars represents the number of patients with the  
 254 comorbidity).

255 a) Mann-Whitney test. c, d, e, f, h, and i) Fisher's exact test. Stacked bars  
256 represent the percentage of patients for each parameter. ns= non-significant; \*, p

### 257 **Blood and serum parameters**

258 We also analyzed the patients' blood counts and serum parameters that were  
259 measured on the day of fecal sample collection.

260 We observed a significant increase in the number of leukocytes (**Fig. 3 a**) and  
261 platelets (**Fig. 3 j**) in patients infected with *C. difficile*. When analyzing the count of  
262 lymphocytes, monocytes and neutrophils individually between both patient  
263 populations, although an increase was evident, we did not find significant  
264 differences (**Fig. 3 b, c and d**). However, it is important to note that CDI+ patients  
265 had increased at least two of these leukocyte populations compared to CDI-  
266 patients at the time of diagnosis (**Fig. 3 e, f and g**). Although some studies have  
267 highlighted that an elevated white blood cell (WBC) count is frequently observed in  
268 the context of CDI <sup>72 73 74</sup>, little has been explored in using elevated WBC count as  
269 a predictor of this infection. In this regard, we agree with Vargas et al. <sup>75</sup> in that the  
270 total leukocyte count alone is not a specific indicator for CDI. Previous work  
271 evaluating platelet count in CDI episodes reported controversial results, assigning  
272 them both a beneficial and detrimental role in relation to clinical symptoms <sup>76-85</sup>.  
273 We have recently shown that platelets bind to *C. difficile* and promote its uptake by  
274 human macrophages using macropinocytic pathways <sup>86</sup>. Therefore, we consider  
275 that platelets in CDI could be fundamental for the resolution of the infection and  
276 that further studies are needed to unravel their role during CDI.

277 Regarding the rest of the blood parameters evaluated, while a significant decrease  
278 in basophils count was observed (**Fig. 3 h**), the eosinophil count was not affected  
279 by the presence of *C. difficile* (**Fig. 3 i**). To the best of our knowledge, to date there  
280 are no reports on the role of basophils in CDI. Nevertheless, the potential role of  
281 CCL-5, a basophilic recruiter chemokine, has been highlighted in CDI <sup>87,88</sup>

282 No differences were evident for creatinine and albumin levels (**Fig. 3 j and k**), but  
283 an elevated urea concentration stood out in patients infected with *C. difficile* (**Fig. 3**  
284 **m**). Moreover, the BUN (Blood Urea Nitrogen)/Creatinine ratio was significantly  
285 elevated in CDI patients (**Fig. 3 n**). Elevated BUN ratios have been associated with  
286 complications of CDI <sup>89</sup> as well as with higher mortality rates <sup>90</sup> and high urea levels  
287 were also proposed as a risk factor for severe CDI <sup>91</sup>.

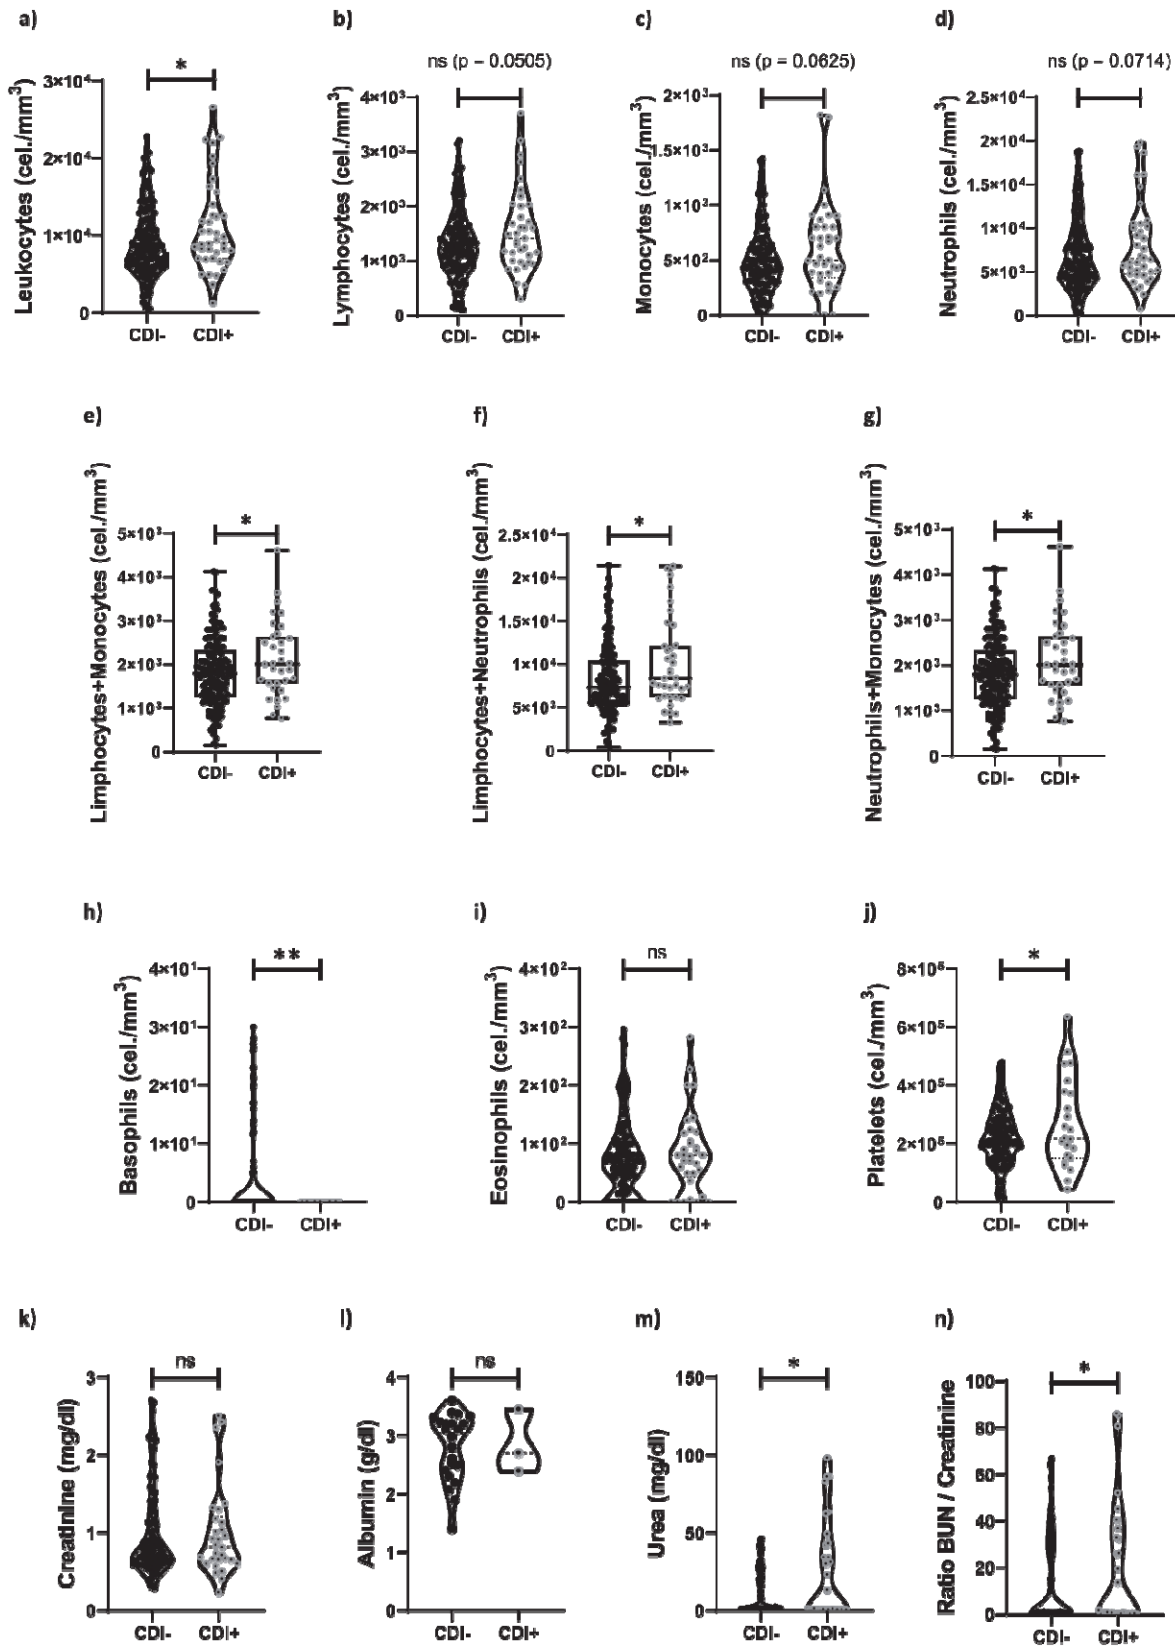

289 **Figure 3.** Blood and serum parameters in CDI+ and CDI- patients.

290 Number of a) Leukocytes (cells/mm<sup>3</sup>), b) lymphocytes (cells/mm<sup>3</sup>), c) monocytes  
291 (cells/mm<sup>3</sup>), d) neutrophils (cells/mm<sup>3</sup>), e) lymphocytes plus monocytes  
292 (cells/mm<sup>3</sup>), f) lymphocytes plus neutrophils (cells/mm<sup>3</sup>), g) neutrophils plus  
293 monocytes (cells/mm<sup>3</sup>), h) basophils (cells/mm<sup>3</sup>), i) eosinophils (cells/mm<sup>3</sup>) and j)  
294 platelets (cells/mm<sup>3</sup>). Levels of k) creatinine (mg/dl), l) albumin (g/dl) and m) urea  
295 (mg/dl). n) BUN (blood urea nitrogen)/creatinine ratio.

296 a-i and k-n) Mann-Whitney test. j) unpaired t test. Violin plots show the distribution  
297 of the data. ns= non-significant; \*, p<0.05; \*\*, p<0.01.

### 298 **Meta-analysis**

299 We finally performed a meta-analysis to obtain more robust and reliable  
300 conclusions about the CDI associated parameters evaluated in our cohort. We  
301 defined the selection criteria (**Fig. 4 a**) and carried out a systematic review that  
302 allowed us to select 40 independent case/control type studies (**Table 2**) from the  
303 countries shown in light grey in **Fig. 4 b**.

304

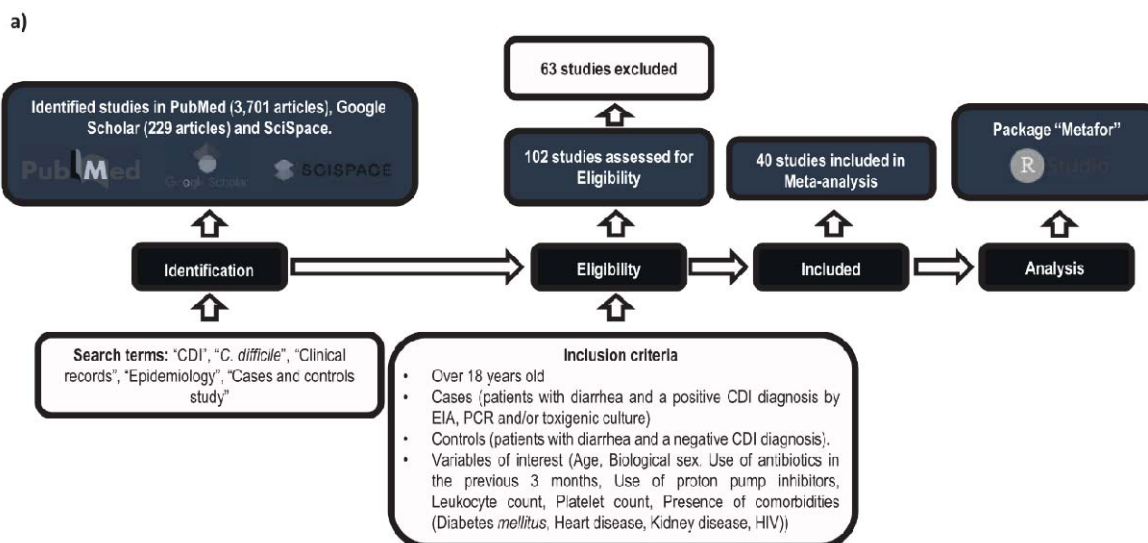

305



b)

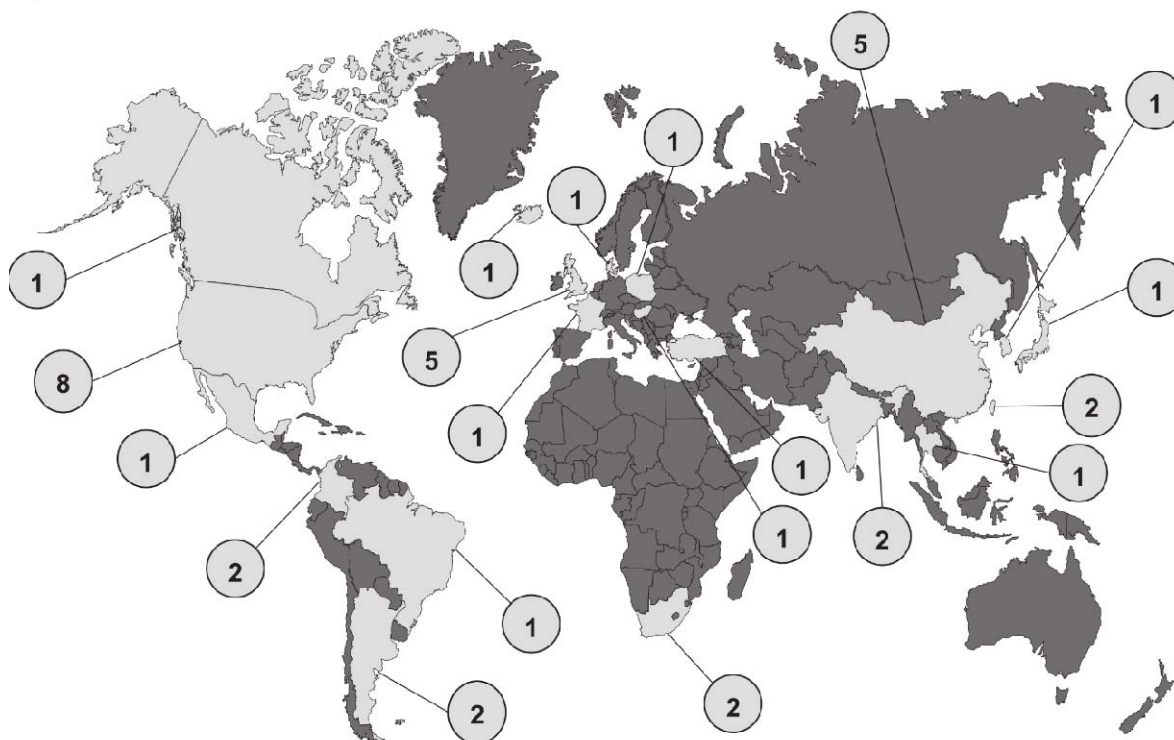

306

307 **Figure 4.** Flow chart of the studies and countries screened and included in the  
308 Meta-analysis.

309 a) The obtained results regarding clinical and demographic characteristics of the  
310 CDI+ and CDI- patients in our cohort were contrasted against findings of other  
311 studies through a meta-analysis by RStudio package “Metafor”. After initial  
312 identification, eligibility criteria were applied and 39 reports were included in the  
313 meta-analysis along with our data. CDI- patients were considered as the control  
314 group.

315 b) World map showing the countries from which the studies included in the meta-  
316 analysis come (light gray). The circles contain the number of studies selected per  
317 country.

318

319

320

321

322

323

324



| Countries      | Studies                                                                             |
|----------------|-------------------------------------------------------------------------------------|
| Argentina      | Lopardo, G. et al, 2015 <sup>39</sup><br><b>OUR study</b>                           |
| Brazil         | Lopes Cançado, G. G. et al, 2018 <sup>92</sup>                                      |
| Canada         | Lowe, D. O. et al, 2006 <sup>93</sup>                                               |
| China          | Dai, W. et al, 2020 <sup>94</sup>                                                   |
|                | Li, Y. et al, 2016 <sup>95</sup>                                                    |
|                | Lv, Z. et al, 2014 <sup>96</sup>                                                    |
|                | Tang, C. et al, 2018 <sup>97</sup>                                                  |
|                | Zhou, F, F, et al, 2014 <sup>98</sup>                                               |
| Colombia       | Carvajal, C. et al, 2017 <sup>99</sup><br>Salazar, C, L. et al, 2017 <sup>100</sup> |
| Denmark        | Soes, L. M. et al, 2014 <sup>101</sup>                                              |
| France         | Le Monnier, A. et al, 2022 <sup>102</sup>                                           |
| Hungary        | Kurti, Z. et al, 2015 <sup>103</sup>                                                |
| Iceland        | Vesteinsdottir, I. et al, 2012 <sup>104</sup>                                       |
| India          | Ingle, M. et al, 2011 <sup>105</sup>                                                |
|                | Ingle, M. et al, 2013 <sup>106</sup>                                                |
| Japan          | Mori, N. et al, 2015 <sup>107</sup>                                                 |
| Mexico         | Morfin-Otero, R. et al, 2016 <sup>108</sup>                                         |
| Poland         | Czepiel, J. et al, 2014 <sup>109</sup>                                              |
| South Africa   | Legenza, L. et al, 2018 <sup>110</sup>                                              |
|                | Rajabally, N. et al, 2013 <sup>111</sup>                                            |
| South Korea    | Han, S. H. et al, 2014 <sup>112</sup>                                               |
| Taiwan         | Lee, Y. C. et al, 2012 <sup>113</sup> ; Lin<br>C. Y. et al, 2022 <sup>114</sup>     |
| Thailand       | Thipmontree, W. et al, 2011 <sup>115</sup>                                          |
| Turkey         | Ergen, E. K. et al, 2009 <sup>116</sup>                                             |
| United Kingdom | Dial, S. et al, 2005 <sup>117</sup>                                                 |
|                | Dial, S. et al, 2008 <sup>118</sup>                                                 |
|                | Marwick, C. A. et al, 2013 <sup>119</sup>                                           |
|                | Suissa, D. et al, 2012 <sup>120</sup>                                               |
|                | Wilcox, M. H. et al, 2008 <sup>121</sup>                                            |
| United States  | Baxter, R. et al, 2008 <sup>122</sup>                                               |
|                | Haddad, F. G. et al, 2019 <sup>123</sup>                                            |
|                | Kuntz, J. L. et al, 2011 <sup>124</sup>                                             |
|                | Kutty, P. K. et al, 2010 <sup>125</sup>                                             |
|                | Kwon, S. et al, 2017 <sup>126</sup>                                                 |
|                | Naggie, S. et al, 2011 <sup>127</sup>                                               |
|                | Tabak, P. Y. et al, 2015 <sup>128</sup>                                             |
|                | Tartof, S. Y. et al, 2015 <sup>129</sup>                                            |

325

326

327 **Table 2.** Countries and studies included in the meta-analysis.

328 The effects for each of the variables evaluated in the meta-analysis are  
329 summarized in **Table 3**.

|     | RISK PREDICTOR                            | OR       |
|-----|-------------------------------------------|----------|
| 330 | Age                                       | 1,19 **  |
| 331 | Biological sex                            | 0,89 *   |
|     | Prior ATB consumption                     | 3,02 *** |
| 332 | Prior PPI consumption                     | 1,29 ns  |
|     | Prior hospitalization                     | 2,45 *** |
| 333 | Prior CDI                                 | 1,76 ns  |
|     | WBC ( $10^9$ cel/mm <sup>3</sup> )        | 1,35 *   |
| 334 | Platelets ( $10^9$ cel/ mm <sup>3</sup> ) | 1,54 ns  |
|     | Comorbidities                             |          |
| 335 | Diabetes <i>mellitus</i>                  | 1,26 ns  |
|     | Heart disease                             | 1,41 *   |
| 336 | Kidney disease                            | 2,23 *** |
| 337 | HIV                                       | 1,00 ns  |

338 **Table 3.** Summary of risk predictors from the meta-analysis.

339 The dataset included 11,596 individuals with CDI and 536,467 matched controls  
340 (**Table 4**). Overall, the distribution of biological sex was 40.06% male vs. 59.94%  
341 female, being 44.33% vs. 55.67% in the CDI+ population and 39.98% vs. 60.02%  
342 in the control group. The demographic parameters Age (OR= 1.19; 95% CI, 1.06 to  
343 1.35) and Biological Sex (OR= 0.89; 95% CI, 0.81 to 0.99) obtained significant  
344 models, which implies that, globally, advanced age and female biological sex are  
345 associated with a higher risk of CDI (**Fig. 5 a and b**).

346 9.11% of the included individuals were previously exposed to antibiotics and  
347 22.18% to PPI. Both antibiotic (CDI+ 39.95% vs. CDI- 8.52%) and PPI (CDI+  
348 29.87% vs. CDI- 21.76%) consumption was higher among those patients infected  
349 with *C. difficile* (**Table 4**). In this analysis, which ignored antibiotic subclasses, we  
350 found that the pooled impact of any antibiotic exposure (OR= 3.02; 95% CI, 2.32 to  
351 3.94) increased the risk of CDI by a multiple of 3 (**Fig. 5 c**). A longer duration of  
352 antibiotic therapy, as well as a greater number of antibiotics administered increase  
353 the probability of CDI<sup>70</sup>. The risk of acquiring CDI could be 8 to 10 times higher  
354 during antibiotic therapy, even three months after its completion, with the first  
355 month being the one with the highest risk<sup>130</sup>.

356 Regarding PPIs as risk factors for CDI, there is an arduous discussion with some  
357 reports showing around 40-71.4% of hospitalized patients received PPI therapy  
358 during hospitalization<sup>131-133</sup> and others supporting the idea that PPIs could trigger  
359 long-term adverse effects through changes on the microbiota composition<sup>134,135</sup>. In  
360 our meta-analysis, there was no evidence of the impact of PPI on CDI risk (**Fig. 5**  
361 **d**).

362 Previous hospitalization emerged as the second most influential predictor for CDI  
 363 risk (OR= 2.46; 95% CI, 1.90 to 3.17) (**Fig. 5 e**). Among the CDI+ patients included  
 364 in the meta-analyses, 27.88% had been hospitalized prior to diagnosis (**Table 4**)  
 365 while only 16.80% in the control group.

366 Previous episodes of CDI are widely reported as a risk factor for subsequent cases  
 367 and/or recurrences in patients. However, in this meta-analysis previous CDI was  
 368 not a predictor of risk (**Fig. 5 f**) which could be attributed to the fact that only 4 of  
 369 the 40 included studies provided this type of data<sup>56,103,120,123</sup>. Actually, when  
 370 evaluating the Forest Plot for this variable in detail, the studies show the same  
 371 trend as our epidemiological study when considering previous CDI as a risk factor.

372 When evaluating comorbidities, both heart diseases (OR= 1.41; 95% CI, 1.02 to  
 373 1.94) and chronic kidney disease (OR= 2.23; 95% CI, 1.38 to 3.61) exhibited  
 374 models with significant effects (**Fig. 5 g and h**), indicating that these pathologies  
 375 increase the risk of CDI. The rest of the tested comorbidities were not associated  
 376 with a higher risk of infection (**Fig. 5 i and j**). The presence of comorbidities has  
 377 been widely reported as a condition that facilitates colonization and infection by *C.*  
 378 *difficile*<sup>136</sup>. A previous meta-analysis found IBD, diabetes, leukemia or lymphoma,  
 379 kidney failure and solid cancer as the CDI risk-related comorbidities<sup>137</sup>.

380 Finally, blood parameters were analyzed. Increased leukocytes count was also a  
 381 potential predictor of CDI according to our comparative analysis (OR= 1.36; 95%  
 382 CI, 1.05 to 1.75) (**Fig. 5 k**). Although the number of platelets did not show a  
 383 statistically significant effect (**Fig. 5 l**), it is important to note that only 2 studies  
 384 apart from ours evaluated this parameter.

385

|                              |         | CDI+   | CDI-   | TOTAL  |
|------------------------------|---------|--------|--------|--------|
| <b>Nº of individuals</b>     |         | 11596  | 536467 | 548467 |
| <b>Sex</b>                   | Male    | 44.33% | 39.98% | 40.06% |
|                              | Female  | 55.67% | 60.02% | 59.94% |
| <b>Prior ATB consumption</b> | With    | 39.95% | 8.52%  | 9.11%  |
|                              | Without | 60.05% | 91.48% | 90.89% |
| <b>Prior PPI consumption</b> | With    | 29.87% | 21.76% | 22.18% |
|                              | Without | 70.13% | 78.24% | 77.82% |
| <b>Prior hospitalization</b> | With    | 27.88% | 16.80% | 17.07% |
|                              | Without | 72.12% | 83.20% | 82.93% |

393 **Table 4.** Meta-analysis dataset.

394

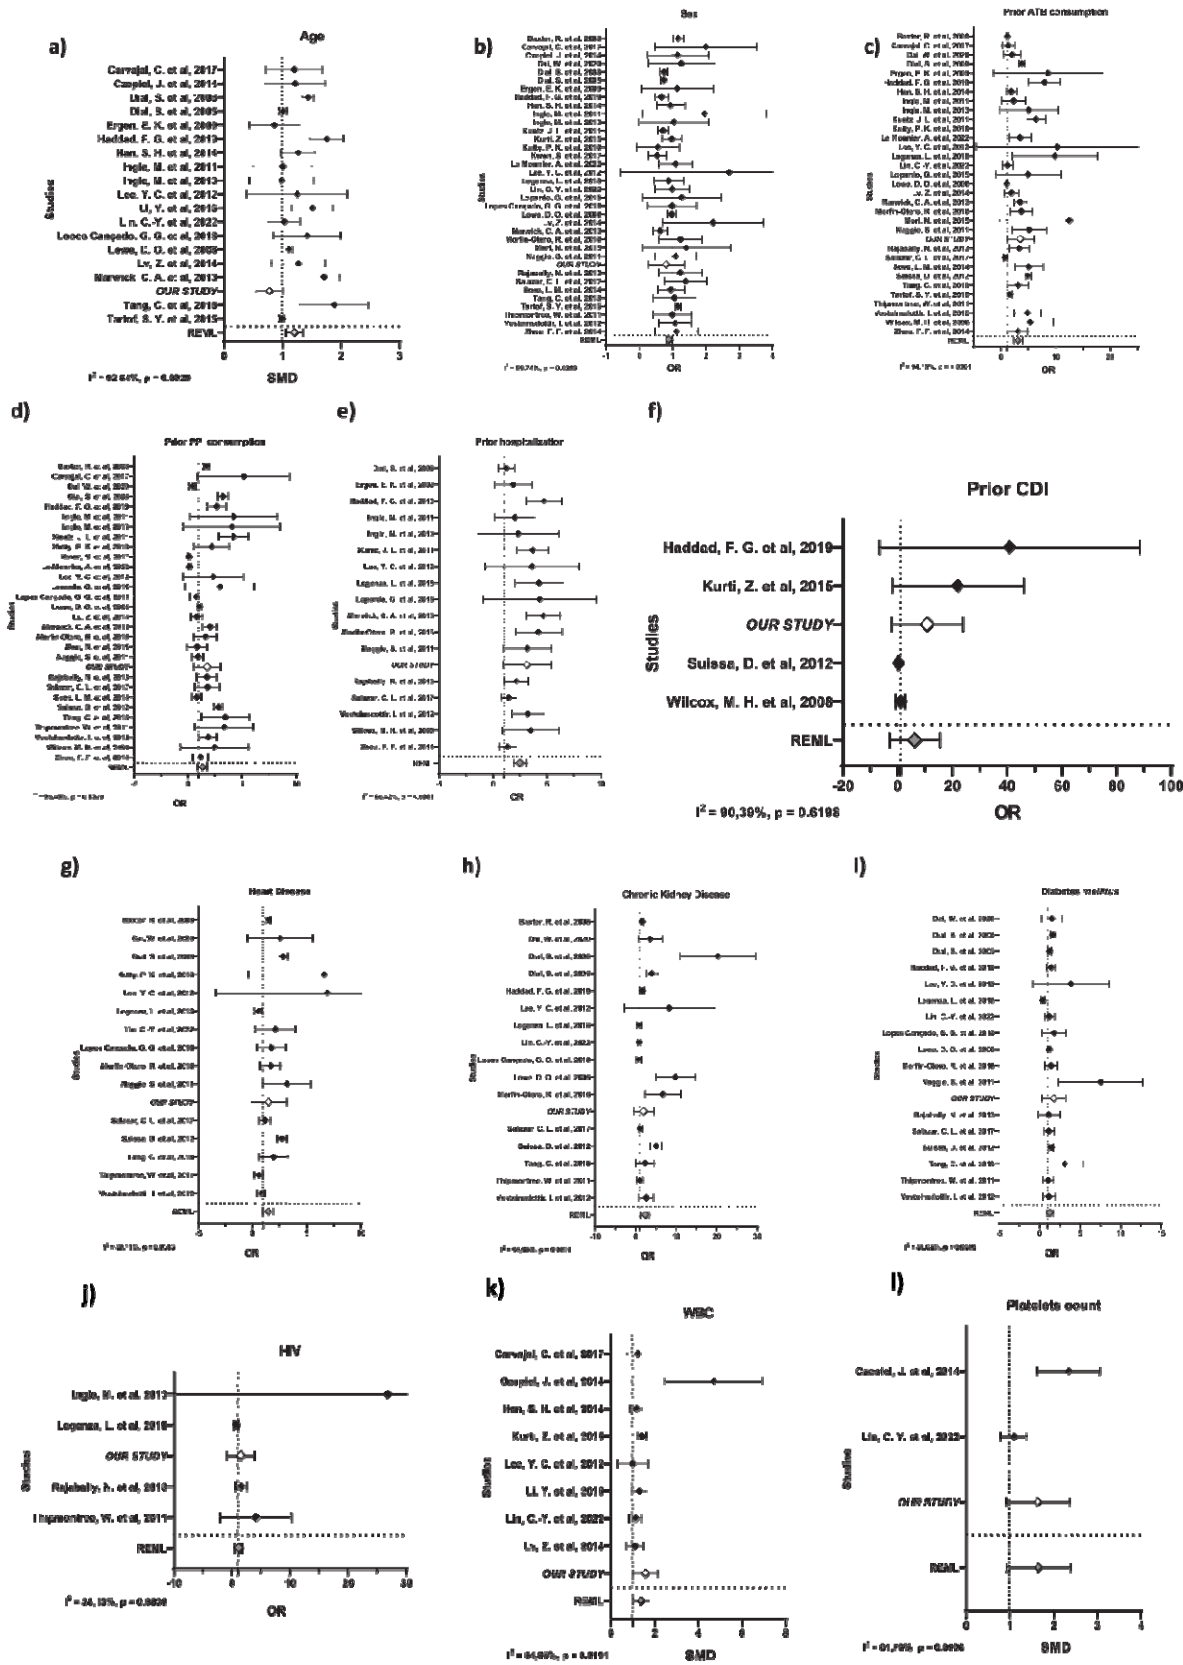

395

396 **Figure 5** Forest plots of risk predictors.

397 Forest plots representative of each variable evaluated in the meta-analysis. a) Age,  
398 b) biological sex, c) previous ATB consumption, d) previous PPI consumption, e)  
399 prior hospitalization, f) prior CDI, g) heart disease, h) chronic kidney disease, i)  
400 diabetes *mellitus*, j) HIV, k) white blood cells (WBC) count (cells/mm<sup>3</sup>), l) platelets  
401 count (cells/mm<sup>3</sup>).

402 A REML (Random Effect Maximum Likelihood, gray diamond) random effects  
403 model was applied. Models with  $p < 0.05$  (OR/SMD  $\pm$  CI values less or greater than  
404 1) were considered as potential risk predictors for CDI. Black diamonds represent  
405 the means of each of the variables in each study. Bars indicate the lower and  
406 upper confidence extremes. Our study (white diamond) is mentioned as *OUR*  
407 *STUDY*.

408 OR= odds ratio. SMD= standard media deviation. CI= confidence interval

409

## 410 **Conclusions**

411 We have defined risk factors associated with CDI and detected modulations in  
412 different blood parameters in our study cohort in Argentina. We have also explored  
413 the relevance of our findings at a global level by a systematic review and meta-  
414 analysis. Our results emphasize the need to detect *C. difficile* as a causal agent of  
415 infectious diarrhea in a country where testing is not standardized or routinely  
416 performed in the health institutions. Our report provides valuable insights that could  
417 contribute to a more efficient surveillance of CDI, diagnosis and follow-up of  
418 patients.

## 419 **Author contributions**

420 Conceptualization: all authors

421 Formal analysis: AMB, NDM, JC, SP, LSM and REHDP.

422 Funding acquisition: AMB, SP, REHDP and VP.

423 Investigation: AMB, NDM, SP, REHDP and VP.

424 Methodology: all authors.

425 Software: NDM and REHDP.

426 Supervision: REHDP and VP.

427 Writing: AMB wrote the original draft. All authors contributed to the review & editing  
428 of this manuscript.

## 429 **Role of the funding source**

430 This work was supported by Universidad Nacional del Noroeste de la Provincia de  
431 Buenos Aires [grant numbers SIB 0618/2019, SIB 2113/2022 and “Proyectos de  
432 Investigación Interdisciplinarios de la UNNOBA” Res. CS 2190/2022, to VP].  
433 Agencia Nacional de Promoción Científica y Tecnológica, Fondo para la  
434 Investigación Científica y Tecnológica [ANPCyT-FONCyT, grant numbers PICT A  
435 2017-1896 and PICT-2021-I-A-01119 to VP; PICT 2018-03084 IB to RHDP, PICT-  
436 2021-I-INVI-00584 to AB and PICT-2021-I-INVI-00208 to SP]. UNNOBA FONCyT  
437 [grant number PICTO 2019-00007 to RHDP and VP]. Consejo Nacional de  
438 Investigaciones Científicas y Técnicas [CONICET, grant number PIP 2021  
439 11220200103137CO to VP and RHDP].

## 440 **Acknowledgements**

441 We thank all the patients who voluntarily participated of this study. We also thank  
442 Natalia Menite, Lucia Romano and Gastón Villafañe for their technical assistance.  
443 We acknowledge the laboratory personnel, medical staff and biochemists who  
444 have collaborated in the collection of samples and data during the study period of  
445 this report. Finally, we thank Flaticon for the icons used in the graphical abstract of  
446 this work.

## 447 References

- 448 1. Brazier JS. . 1998;47–57.
- 449 2. Zhang S, Palazuelos-Munoz S, Balsells EM, et al. . *BMC Infect Dis*;16 . Epub  
450 ahead of print 2016. DOI: 10.1186/s12879-016-1786-6.
- 451 3. Center for Disease Control and Prevention. . *CDC*;10 . Epub ahead of print  
452 2019. DOI: 10.1186/s13756-020-00872-w.
- 453 4. Smits WK, Lyras D, Lacy DB, et al. . DOI: 10.1038/nrdp.2016.20.
- 454 5. Feuerstadt P, Theriault N, Tillotson G. . *BMC Infect Dis*. 2023;23:1–8.
- 455 6. Di X, Bai N, Zhang X, et al. . *Brazilian J Infect Dis*. 2015;19:339–349.
- 456 7. Bainum TB, Reveles KR, Hall RG, et al. . *Microorganisms*. 2023;11:1–22.
- 457 8. Phanchana M, Harnvoravongchai P, Wongkuna S, et al. . *World J*  
458 *Gastroenterol*. 2021;27:7210–7232.
- 459 9. Burke KE, Lamont JT. . *Gut Liver*. 2014;8:1–6.
- 460 10. Freeman J, Bauer MP, Baines SD, et al. . *Clinical Microbiology Reviews*.  
461 2010;23:529–549.
- 462 11. Goorhuis A, Bakker D, Corver J, et al. . *Clin Infect Dis*. 2008;47:1162–1170.
- 463 12. Chitnis AS, Holzbauer SM, Belflower RM, et al. . *JAMA Intern Med*.  
464 2013;173:1359–1367.
- 465 13. Ruiten-Ligeti J, Vincent S, Czuzoj-Shulman N, et al. . *Obstet Gynecol*.  
466 2018;131:387–391.
- 467 14. Gupta A, Khanna S. . *Infect Drug Resist*. 2014;7:63–72.
- 468 15. Alice Y. Guh, MD, MPH and Preeta K. Kutty, MD M. . *Physiol Behav*.  
469 2019;169:248–256.
- 470 16. Lawler AJ, Lambert PA, Worthington T. . *Trends Microbiol*. 2020;28:744–  
471 752.
- 472 17. Paredes-Sabja D, Shen A, Sorg JA. . *Trends Microbiol*. 2014;22:1–15.
- 473 18. Hernández Del Pino RE, Barbero AM, Español LÁ, et al. . *J Leukoc Biol*.  
474 2021;109:195–210.
- 475 19. Lim SC, Knight DR, Riley T V. . *Clin Microbiol Infect*. 2020;26:857–863.
- 476 20. Donskey CJ. . *Clin Infect Dis*. 2010;50:1458–1461.
- 477 21. Dicks LMT. . *Microorganisms*;11 . Epub ahead of print 2023. DOI:  
478 10.3390/microorganisms11092161.
- 479 22. Czepiel J, Drózdź M, Pituch H, et al. . *Eur J Clin Microbiol Infect Dis Off*  
480 *Publ Eur Soc Clin Microbiol*. 2019;38:1211–1221.



- 481 23. Huang CH, Tseng YH, Tsai WS, et al. . *Infect Dis Ther* . Epub ahead of print  
482 2024. DOI: 10.1007/s40121-024-00922-5.
- 483 24. Song JH, Kim YS. . *Gut Liver*. 2019;13:16–24.
- 484 25. Nitzan O, Elias M, Chazan B, et al. . *World J Gastroenterol*. 2013;19:7577–  
485 7585.
- 486 26. Qu H-Q, Jiang Z-D. . *Diabetes Res Clin Pract*. 2014;105:285–294.
- 487 27. Dudzicz S, Wiecek A, Adamczak M. . *J Clin Med*. 2021;10:1–13.
- 488 28. Sartelli M, Malangoni MA, Abu-Zidan FM, et al. . *World J Emerg Surg*.  
489 2015;10:1–23.
- 490 29. Khanna S, Pardi DS. . *Mayo Clin Proc*. 2012;87:1106–1117.
- 491 30. Curcio D, Cané A, Fernández FA, et al. . *Infect Dis Ther*. 2019;8:87–103.
- 492 31. Roldan GA, Cui AX, Pollock NR. . *J Clin Microbiol*;56 . Epub ahead of print  
493 March 2018. DOI: 10.1128/JCM.01747-17.
- 494 32. Acuña-Amador L, Quesada-Gómez C, Rodríguez C. . *Anaerobe*;74 . Epub  
495 ahead of print 2022. DOI: 10.1016/j.anaerobe.2022.102547.
- 496 33. Crobach MJT, Planche T, Eckert C, et al. . *Clin Microbiol Infect*.  
497 2016;22:S63–S81.
- 498 34. Johnson S, Lavergne V, Skinner AM, et al. . *Clin Infect Dis*. 2021;73:e1029–  
499 e1044.
- 500 35. Viechtbauer W. . *J Stat Softw*. 2010;36:1–48.
- 501 36. Fernandez Canigia L, Nazar J, Arce M, et al. . *Rev Argent Microbiol*.  
502 2001;33:101–107.
- 503 37. Legaria MC, Lumelsky G, Rosetti S. . *Anaerobe*. 2003;9:113–116.
- 504 38. Goorhuis A, Legaria MC, van den Berg RJ, et al. . *Clin Microbiol Infect*.  
505 2009;15:1080–1086.
- 506 39. Lopardo G, Morfin-Otero R, Moran-Vazquez II, et al. . *Brazilian J Infect Dis*.  
507 2015;19:8–14.
- 508 40. Bartlett JG, Gerding DN. . *Clinical Infectious Diseases*;46 . Epub ahead of  
509 print January 2008. DOI: 10.1086/521863.
- 510 41. Pan L, Mu M, Yang P, et al. . *Am J Gastroenterol*. 2020;115:766–773.
- 511 42. Granata G, Petrosillo N, Al Moghazi S, et al. . *Anaerobe*. 2022;74:102484.
- 512 43. Huttner BD, Catho G, Pano-Pardo JR, et al. . *Clin Microbiol Infect Off Publ*  
513 *Eur Soc Clin Microbiol Infect Dis*. 2020;26:808–810.
- 514 44. Chen N, Zhou M, Dong X, et al. . *Lancet (London, England)*. 2020;395:507–

- 515            513.
- 516    45.    Adams-Sommer V, Fu Y, Grinspan LT, et al. . *Infect Control Hosp Epidemiol.*  
517            2021;42:1165–1166.
- 518    46.    Laszkowska M, Kim J, Faye AS, et al. . *Dig Dis Sci.* 2021;66:4398–4405.
- 519    47.    Hawes AM, Desai A, Patel PK. . *Anaerobe.* 2021;70:102384.
- 520    48.    Luo M, Liu Y, Wu P, et al. . 8 . Epub ahead of print 2017. DOI:  
521            10.3389/fphys.2017.00822.
- 522    49.    Khanna S, Kraft CS. . *Future Microbiol.* 2021;16:439–443.
- 523    50.    Tariq R, Saha S, Furqan F, et al. . *Mayo Clin Proc.* 2020;95:1632–1648.
- 524    51.    Louie TJ, Cannon K, Byrne B, et al. . *Clin Infect Dis an Off Publ Infect Dis*  
525            *Soc Am.* 2012;55 Suppl 2:S132-42.
- 526    52.    Guh AY, Mu Y, Winston LG, et al. . *N Engl J Med.* 2020;382:1320–1330.
- 527    53.    Gentry CA, Williams RJ 2nd, Campbell D. . *Diagn Microbiol Infect Dis.*  
528            2021;100:115308.
- 529    54.    McDermott LA, Thorpe CM, Goldstein E, et al. . *Open Forum Infect Dis.*  
530            2022;9:ofac492.1299.
- 531    55.    Dingle KE, Didelot X, Quan TP, et al. . *Lancet Infect Dis.* 2017;17:411–421.
- 532    56.    Wilcox MH, Shetty N, Fawley WN, et al. . *Clin Infect Dis.* 2012;55:1056–  
533            1063.
- 534    57.    Khanna S, Pardi DS, Aronson SL, et al. . *Am Coll Gastroenterol*;107.
- 535    58.    European Centre for Disease Prevention and Control. . *Annu Epidemiol Rep*  
536            *Commun Dis Eur.* 2016;40:335–348.
- 537    59.    Carlson TJ, Blasingame D, Gonzales-Luna AJ, et al. . *Anaerobe.*  
538            2020;62:102142.
- 539    60.    Kincaid SE. . *Consult Pharm J Am Soc Consult Pharm.* 2010;25:834–836.
- 540    61.    Owens RC. . *Drugs.* 2007;67:487–502.
- 541    62.    Bassaris HP, Lianou PE, Legakis NJ, et al. . *Med Microbiol Immunol.*  
542            1984;173:49–55.
- 543    63.    Nakamura S, Mikawa M, Nakashio S, et al. . *Microbiol Immunol.*  
544            1981;25:345–351.
- 545    64.    Bacon AE, Fekety R. . *Diagn Microbiol Infect Dis.* 1994;18:205–209.
- 546    65.    Simor AE, Bradley SF, Strausbaugh LJ, et al. . *Infect Control Hosp*  
547            *Epidemiol.* 2002;23:696–703.
- 548    66.    Guerrero DM, Nerandzic MM, Jury LA, et al. . *Am J Infect Control.*

- 549 2012;40:556–558.
- 550 67. Edwards AN, Karim ST, Pascual RA, et al. . *Front Microbiol.* 2016;7:1698.
- 551 68. Clark T, Wiselka M. . *Clin Med.* 2008;8:544–547.
- 552 69. Schroeder MS. . *Am Fam Physician.* 2005;71:921–928.
- 553 70. Hessen MT. . *Ann Intern Med.* 2010;153:ITC41-15; quiz ITC416.
- 554 71. Dubberke ER, Wertheimer AI. . *Infect Control Hosp Epidemiol.* 2009;30:57–  
555 66.
- 556 72. Wanahita A, Goldsmith EA, Marino BJ, et al. . *Am J Med.* 2003;115:543–546.
- 557 73. Wanahita A, Goldsmith EA, Musher DM. . *Clin Infect Dis an Off Publ Infect*  
558 *Dis Soc Am.* 2002;34:1585–1592.
- 559 74. Bulusu M, Narayan S, Shetler K, et al. . *Am J Gastroenterol.* 2000;95:3137–  
560 3141.
- 561 75. Vargas E, Apewokin S, Madan R. . *Anaerobe.* 2017;45:101–105.
- 562 76. Mihăilă RG, Cătană C, Olteanu AL, et al. . *Biomarkers.* 2019;24:389–393.
- 563 77. Buchrits S, Gafter-Gvili A, Bishara J, et al. . *J Clin Med*;10 . Epub ahead of  
564 print July 2021. DOI: 10.3390/jcm10132957.
- 565 78. Lee DY, Chung EL, Guend H, et al. . *Ann Surg.* 2014;259:148–156.
- 566 79. Byrn JC, Maun DC, Gingold DS, et al. . *Med Hist.* 2012;143:150–154.
- 567 80. Nseir W, Khamisy-Farah R, Amara A, et al. . *Isr Med Assoc J.* 2019;21:658–  
568 661.
- 569 81. Allegretti JR, Marcus J, Storm M, et al. . *Dig Dis Sci.* 2020;65:1761–1766.
- 570 82. Zhao L, Luo Y, Bian Q, et al. . *Infect Drug Resist.* 2020;13:171–181.
- 571 83. Pant C, Madonia PN, Jordan P, et al. . *J Investig Med.* 2009;57:40–42.
- 572 84. Yan D, Chen Y, Lv T, et al. . *J Med Microbiol.* 2017;66:1483–1488.
- 573 85. Phanchana M, Phetruen T, Harnvoravongchai P, et al. . *Sci Rep.* 2020;10:1–  
574 8.
- 575 86. Barbero AM, Hernández Del Pino RE, Fuentes F, et al. . 2024;1–14.
- 576 87. Rao K, Erb-Downward JR, Walk ST, et al. . *PLoS One.* 2014;9:e92578.
- 577 88. Abhyankar MM, Ma JZ, Scully KW, et al. . *Am Soc Microbiol.* 2020;11:1–10.
- 578 89. Abou Chakra CN, McGeer A, Labbe AC, et al. . *Clin Infect Dis.*  
579 2015;61:1781–1788.
- 580 90. Sartelli M, Di Bella S, McFarland L V., et al. . *World J Emerg Surg.*  
581 2019;14:1–29.

- 582 91. Bermejo Boixareu C, Tutor-Ureta P, Ramos Martínez A. . *Rev Esp Geriatr*  
583 *Gerontol.* 2020;55:225–235.
- 584 92. Lopes Cançado GG, Silveira Silva RO, Rupnik M, et al. . *Anaerobe.*  
585 2018;54:65–71.
- 586 93. Lowe DO, Mamdani MM, Kopp A, et al. Proton Pump Inhibitors and  
587 Hospitalization for Clostridium Difficile-Associated Disease: A Population-  
588 Based Study.
- 589 94. Dai W, Yang T, Yan L, et al. . *BMC Infect Dis*;20 . Epub ahead of print April  
590 2020. DOI: 10.1186/s12879-020-05014-6.
- 591 95. Li Y, Huang Y, Li Y, et al. . *Pakistan J Med Sci.* 2016;32:736–741.
- 592 96. Lv Z, Peng GL, Su JR. . *Brazilian J Med Biol Res.* 2014;47:1085–1090.
- 593 97. Tang C, Li Y, Liu C, et al. . *Am J Infect Control.* 2018;46:285–290.
- 594 98. Zhou FF, Wu S, Klena JD, et al. . *Eur J Clin Microbiol Infect Dis.*  
595 2014;33:1773–1779.
- 596 99. Carvajal C, Pacheco C, Jaimes F. . *Biomedica.* 2017;37:53–61.
- 597 100. Salazar CL, Reyes C, Atehortua S, et al. . *PLoS One*;12 . Epub ahead of  
598 print September 2017. DOI: 10.1371/journal.pone.0184689.
- 599 101. Soes LM, Holt HM, Böttiger B, et al. . *Epidemiol Infect.* 2014;142:1437–1448.
- 600 102. Le Monnier A, Candela T, Mizrahi A, et al. . *J Hosp Infect.* 2022;129:65–74.
- 601 103. Kurti Z, Lovasz BD, Mandel MD, et al. . *World J Gastroenterol.*  
602 2015;21:6728–6735.
- 603 104. Vesteynsdottir I, Gudlaugsdottir S, Einarsdottir R, et al. . *Eur J Clin Microbiol*  
604 *Infect Dis.* 2012;31:2601–2610.
- 605 105. Ingle M, Deshmukh A, Desai D, et al. . *Indian J Gastroenterol.* 2011;30:89–  
606 93.
- 607 106. Ingle M, Deshmukh A, Desai D, et al. . *Indian J Gastroenterol.* 2013;32:179–  
608 183.
- 609 107. Mori N, Aoki Y. . *J Infect Chemother.* 2015;21:864–867.
- 610 108. Morfin-Otero R, Garza-Gonzalez E, Aguirre-Diaz SA, et al. . *Brazilian J Infect*  
611 *Dis.* 2016;20:8–13.
- 612 109. Czepiel J, Biesiada G, Brzozowski T, et al. . *J Physiol Pharmacol an Off J*  
613 *Polish Physiol Soc.* 2014;65:695–703.
- 614 110. Legenza L, Barnett S, Rose W, et al. . *BMJ Glob Heal*;3 . Epub ahead of  
615 print July 2018. DOI: 10.1136/bmjgh-2018-000889.
- 616 111. Rajabally N, Pentecost M, Pretorius G, et al. . *South African Med J.*

- 617 2013;103:168–172.
- 618 112. Han SH, Kim H, Lee K, et al. . *J Med Microbiol*. 2014;63:1542–1551.
- 619 113. Lee YC, Wang JT, Chen AC, et al. . *J Microbiol Immunol Infect*.  
620 2012;45:287–295.
- 621 114. Lin C-Y, Cheng H-T, Kuo C-J, et al. . *Microbiol Spectr*;10 . Epub ahead of  
622 print August 2022. DOI: 10.1128/spectrum.00486-22.
- 623 115. Thipmontree W, Kiratisin P, Manatsathit S, et al. Epidemiology of Suspected  
624 *Clostridium difficile*-Associated Hospital-Acquired Diarrhea in Hospitalized  
625 Patients at Siriraj Hospital. 2011.
- 626 116. Ergen EK, Akalin H, Yilmaz E, et al. . *Med Mal Infect*. 2009;39:382–387.
- 627 117. Dial S, Delaney JAC, Barkun AN, et al. . *JAMA*. 2005;294:2989–2995.
- 628 118. Dial S, Kezouh A, Dascal A, et al. . *C Can Med Assoc J*. 2008;179:767–772.
- 629 119. Marwick CA, Yu N, Lockhart MC, et al. . *J Antimicrob Chemother*.  
630 2013;68:2927–2933.
- 631 120. Suissa D, Delaney JAC, Dial S, et al. . *Br J Clin Pharmacol*. 2012;74:370–  
632 375.
- 633 121. Wilcox MH, Mooney L, Bendall R, et al. . *J Antimicrob Chemother*.  
634 2008;62:388–396.
- 635 122. Baxter R, Ray GT, Fireman BH. . *Infect Control Hosp Epidemiol*.  
636 2008;29:44–50.
- 637 123. Haddad FG, Zaidan J, Polavarapu A, et al. . *Z Gastroenterol*. 2019;57:1183–  
638 1195.
- 639 124. Kuntz JL, Chrischilles EA, Pendergast JF, et al. . *BMC Infect Dis*;11 . Epub  
640 ahead of print July 2011. DOI: 10.1186/1471-2334-11-194.
- 641 125. Kutty PK, Woods CW, Sena AC, et al. . *Emerg Infect Dis*. 2010;16:197–204.
- 642 126. Kwon SS, Gim JL, Kim MS, et al. . *Anaerobe*. 2017;48:42–46.
- 643 127. Naggie S, Miller BA, Zuzak KB, et al. . *Am J Med*;124 . Epub ahead of print  
644 March 2011. DOI: 10.1016/j.amjmed.2010.10.013.
- 645 128. Tabak YP, Johannes RS, Sun X, et al. . *Infect Control Hosp Epidemiol*.  
646 2015;36:695–701.
- 647 129. Tartof SY, Rieg GK, Wei R, et al. . *Infect Control Hosp Epidemiol*.  
648 2015;36:1409–1416.
- 649 130. Hensgens MPM, Goorhuis A, Dekkers OM, et al. . *J Antimicrob Chemother*.  
650 2012;67:742–748.
- 651 131. Nardino RJ, Vender RJ, Herbert PN. . *Am J Gastroenterol*. 2000;95:3118–

- 652           3122.
- 653   132. Herzig SJ, Howell MD, Ngo LH, et al. . *JAMA*. 2009;301:2120–2128.
- 654   133. Pham CQD, Regal RE, Bostwick TR, et al. . *Ann Pharmacother*.  
655           2006;40:1261–1266.
- 656   134. Freedberg DE, Lebwohl B, Abrams JA. . *Clin Lab Med*. 2014;34:771–785.
- 657   135. Singh A, Cresci GA, Kirby DF. . *Nutr Clin Pract Off Publ Am Soc Parenter*  
658           *Enter Nutr*. 2018;33:614–624.
- 659   136. van Prehn J, Reigadas E, Vogelzang EH, et al. . *Clin Microbiol Infect*.  
660           2021;27:S1–S21.
- 661   137. Furuya-Kanamori L, Stone JC, Clark J, et al. . *Infect Control Hosp Epidemiol*.  
662           2015;36:132–141.
- 663

a)

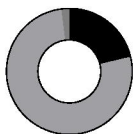

■ 21.29% Positive  
 ■ 76.70% Negative  
 ■ 02.01% Discordant

b)

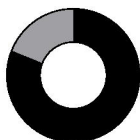

■ 81.13% Toxigenic  
 ■ 18.87% Non-toxicogenic

c)

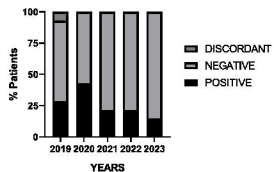

d)

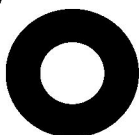

■ 100.00% Moderate

e)

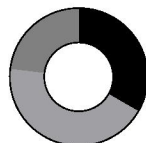

■ 33.33% Community-acquired  
 ■ 43.59% Hospital-acquired  
 ■ 23.08% Community-acquired associated to healthcare environments



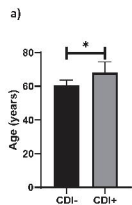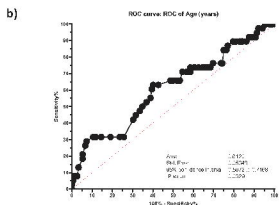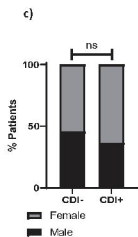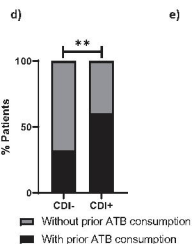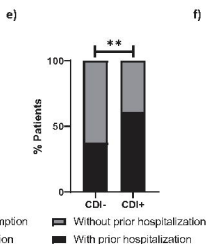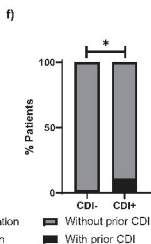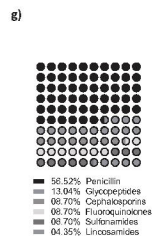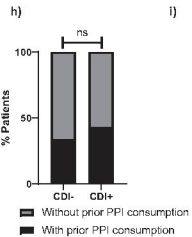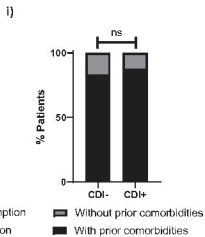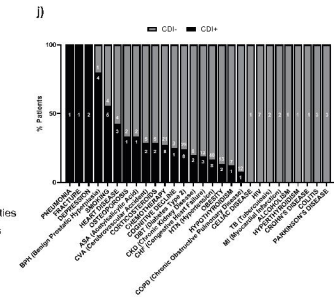

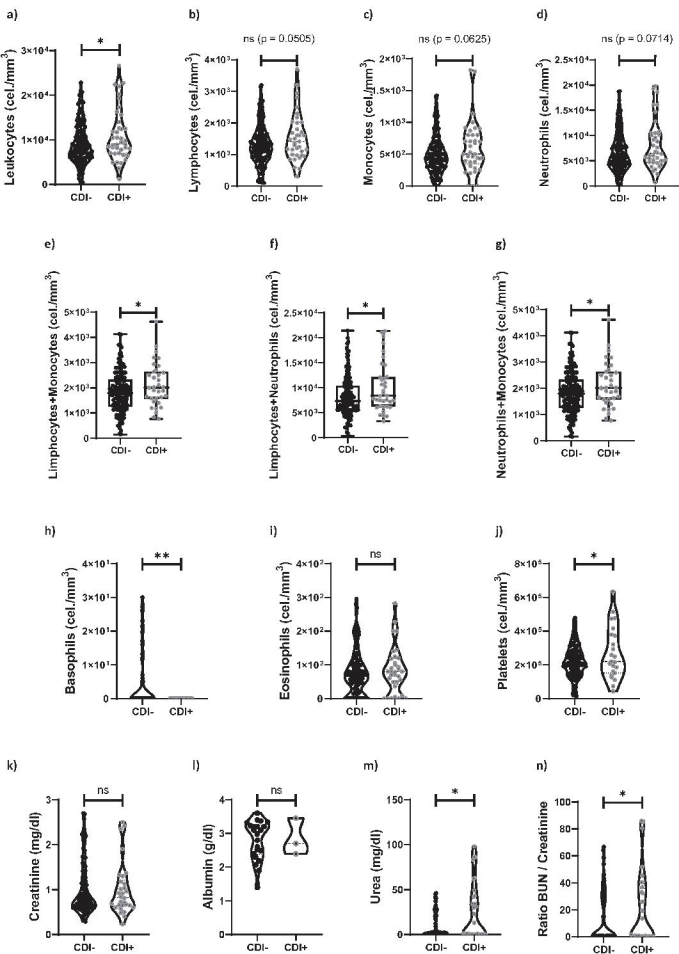

a)

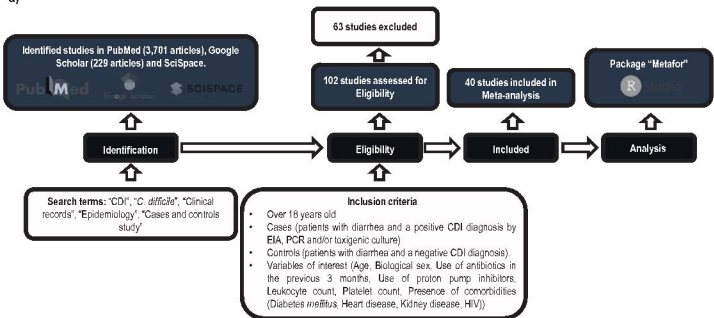

b)

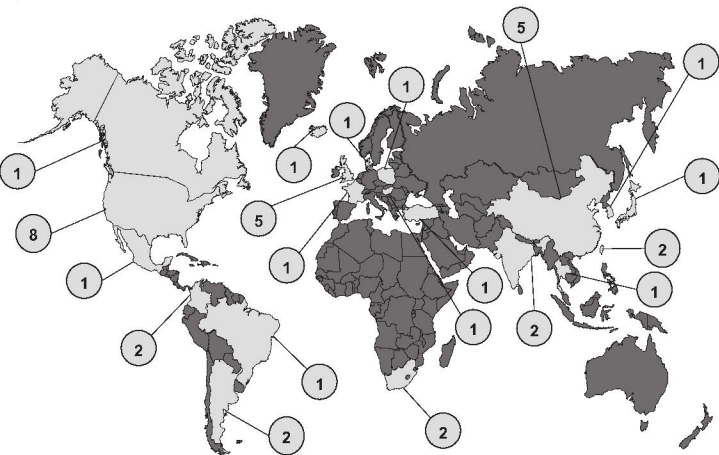

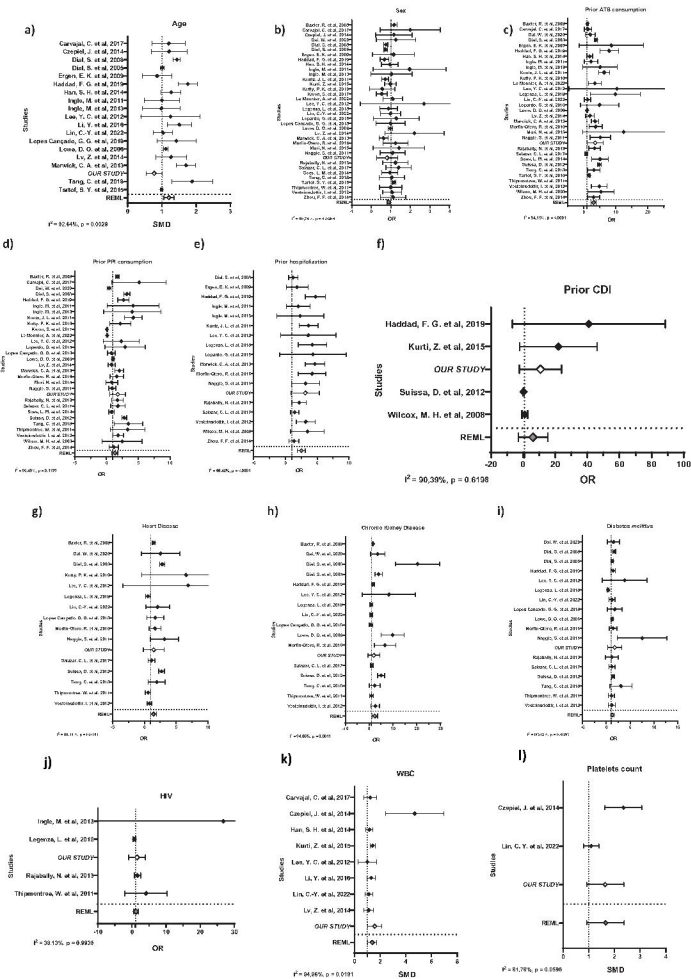

## STUDY COHORT

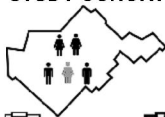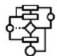

Diagnostic  
algorithm

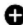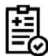

Clinical  
records

20%

of patients had *C. difficile* as the causal agent of their diarrheas

>30%

of CDI infections occurred in the community setting

80%

of the patients were infected with toxigenic strains

100%

of infected patients had a moderate diarrhea classification

## RISK FACTORS

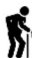

Advanced age

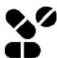

Prior  
antibiotic use

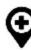

Prior  
hospitalization

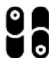

Prior CDI

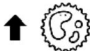

Leukocytosis

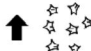

Thrombocytosis

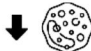

Basophilopenia

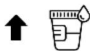

Elevated urea

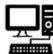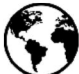

Meta-analysis

## GLOBAL RISK FACTORS

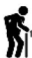

Advanced age

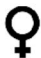

Female

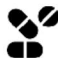

Prior  
antibiotic use

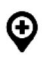

Prior  
hospitalization

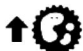

Leukocytosis

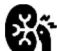

Chronic kidney  
disease

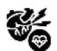

Heart  
diseases

## SANITARY REGION III

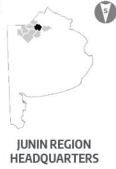

- Hospital Interzonal General de Agudos Abraham Piñeyro
- C.P.A.: Provincial Center for Addiction Care

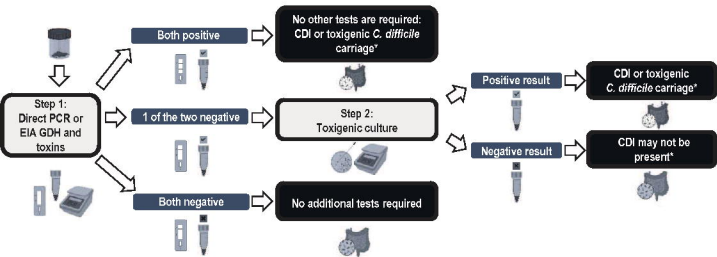

*\*clinical evaluation is required in all cases*



a)

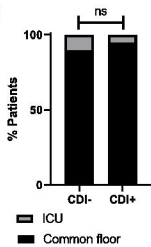

b)

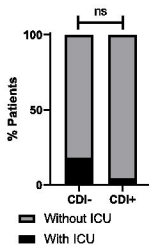

c)

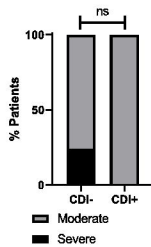

d)

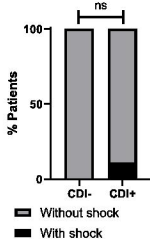

e)

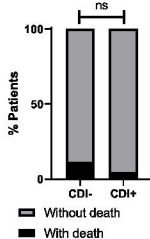

Source: https://medrxiv.org/content/10.1101/2024.04.25.24306385v2.full.pdf
